# Supplementary material
Source: publisher site journal article supplement (https://www.dovepress.com/article/406933)
Supplement: Supplementary file 1 [file get_supplementary_file.php]

**Appendix 1: Data collection form**

1. Age of the mother (specify in years)
2. Age of the child (Specify as year and months)
3. How many child/children you have? (Including this child)
4. Education
5. No formal schooling
6. Up to high school
7. University and above
8. Marital status
9. Married
10. Divorced/Widowed
11. Occupation
12. Unemployed
13. Government
14. Private
15. Self employed (business)
16. Monthly family income
17. Less than 5000 SAR
18. 5000 to 7000 SAR
19. More than 7000 SAR
20. Source of information regarding childhood vaccine
21. Family
22. Friends and acquittances
23. Ministry of health / Public health authority
24. Healthcare providers
25. TV
26. Internet including social media such as Facebook, Instagram, twitter etc

**How much do you agree with the each of the following statement on vaccinations? Please indicate your response with a check mark (✓) in the appropriate box, using the scale below:**

| S.No | Indicator | Strongly agree | Agree | Neither agree nor disagree | Disagree | Strongly disagree |
| --- | --- | --- | --- | --- | --- | --- |
| 1 | Childhood vaccines are important for my child's health |  |  |  |  |  |
| 2 | Childhood vaccines are effective |  |  |  |  |  |
| 3 | Having my child vaccinated is important for the health of others in my community |  |  |  |  |  |
| 4 | All childhood vaccines offered by the government program in my community are beneficial. |  |  |  |  |  |
| 5 | New vaccines carry more risks than older vaccines |  |  |  |  |  |
| 6 | The information I receive about vaccines from the vaccine program is reliable and trustworthy. |  |  |  |  |  |
| 7 | It is better for a child to develop immunity by getting sick than to get a vaccine. |  |  |  |  |  |
| 8 | Generally, I do what my doctor or health care provider recommends about vaccines for my child/children. |  |  |  |  |  |
| 9 | I am concerned about serious adverse effects of vaccines. |  |  |  |  |  |
| 10 | My child does not need vaccines for diseases that are not common anymore. |  |  |  |  |  |

**How much do you satisfied with the each of the following statement on vaccination services provided to your child? Please indicate your response with a check mark (✓) in the appropriate box, using the scale below:**

| S.No | Indicator | Very much satisfied | Satisfied | Neutral | Dissatisfied | Very much dissatisfied |
| --- | --- | --- | --- | --- | --- | --- |
| 1 | Ease of registration and scheduling at the healthcare facility |  |  |  |  |  |
| 2 | Waiting time before getting vaccine services by the healthcare providers |  |  |  |  |  |
| 3 | What is your satisfaction level on facilities such as waiting area, examination room etc? |  |  |  |  |  |
| 4 | Healthcare providers explanation on different childhood vaccination and importance of getting vaccinated |  |  |  |  |  |
| 5 | The time spent by the healthcare providers to upon my child having vaccinated |  |  |  |  |  |
| 6 | Advice from the healthcare providers, upon my having vaccinated |  |  |  |  |  |
| 7 | Briefing given to me on the dose and route of vaccine administration |  |  |  |  |  |
| 8 | The healthcare providers consideration on my concerns about vaccination seriously |  |  |  |  |  |
| 9 | Follow up advice regarding possible adverse effect and its management |  |  |  |  |  |
| 10 | Follow up advice regarding next vaccine and compliance on taking on scheduled date |  |  |  |  |  |

**Data collection form – Arabic**

نموذج جمع البيانات

1. عمر الأم (حدد بالسنوات)
2. عمر الطفل (حدد على أنه سنة وشهور)
3. كم عدد الأطفال / الأطفال لديك؟ (بما في ذلك هذا الطفل)
4. تعليم
5. لا يوجد تعليم رسمي
6. حتى المدرسة الثانوية
7. الجامعة وما فوق
8. الحالة الاجتماعية
9. متزوج
10. مطلق / أرمل
11. احتلال
12. عاطل
13. حكومة
14. عسكري
15. العاملين لحسابهم الخاص (الأعمال)
16. دخل الأسرة الشهري
17. اقل من 5000 SAR
18. 5000 إلى 7000 ريال سعودي
19. اكثر من 7000 SAR
20. مصدر المعلومات المتعلقة بلقاح الطفولة
21. أسرة
22. الأصدقاء والبراءة
23. وزارة الصحة / هيئة الصحة العامة
24. مقدمو الرعاية الصحية
25. تلفزيون
26. الإنترنت بما في ذلك وسائل التواصل الاجتماعي مثل Facebook و Instagram و Twitter وما إلى ذلك

**ما مدى موافقتك على كل بيان من العبارات التالية بشأن التطعيمات؟ يرجى الإشارة إلى ردك بعلامة اختيار (✓) في المربع المناسب، باستخدام المقياس أدناه:**

| S.No | مؤشر | أوافق بشدة | اصطلح | لا توافق ولا تختلف | اختلف | لا أوافق بشدة |
| --- | --- | --- | --- | --- | --- | --- |
| 1 | لقاحات الطفولة مهمة لصحة طفلي |  |  |  |  |  |
| 2 | لقاحات الأطفال فعالة |  |  |  |  |  |
| 3 | تطعيم طفلي مهم لصحة الآخرين في مجتمعي |  |  |  |  |  |
| 4 | جميع لقاحات الطفولة التي يقدمها البرنامج الحكومي في مجتمعي مفيدة. |  |  |  |  |  |
| 5 | اللقاحات الجديدة تحمل مخاطر أكثر من اللقاحات القديمة |  |  |  |  |  |
| 6 | المعلومات التي أتلقاها حول اللقاحات من برنامج اللقاحات موثوقة وجديرة بالثقة. |  |  |  |  |  |
| 7 | من الأفضل للطفل أن يطور مناعة عن طريق المرض بدلا من الحصول على لقاح. |  |  |  |  |  |
| 8 | بشكل عام ، أفعل ما يوصي به طبيبي أو مقدم الرعاية الصحية حول اللقاحات لطفلي / أطفالي. |  |  |  |  |  |
| 9 | ويساورني القلق إزاء الآثار الضارة الخطيرة للقاحات. |  |  |  |  |  |
| 10 | طفلي لا يحتاج إلى لقاحات للأمراض التي لم تعد شائعة بعد الآن. |  |  |  |  |  |

**ما مدى رضاك عن كل بيان من البيانات التالية حول خدمات التطعيم المقدمة لطفلك؟ يرجى الإشارة إلى ردك بعلامة اختيار (✓) في المربع المناسب، باستخدام المقياس أدناه:**

| S.No | مؤشر | راض جدا | قنع | محايد | غير راضين | غير راض جدا |
| --- | --- | --- | --- | --- | --- | --- |
| 1 | سهولة التسجيل والجدولة في منشأة الرعاية الصحية |  |  |  |  |  |
| 2 | وقت الانتظار قبل الحصول على خدمات اللقاح من قبل مقدمي الرعاية الصحية |  |  |  |  |  |
| 3 | ما هو مستوى رضاك عن المرافق مثل منطقة الانتظار وغرفة الفحص وما إلى ذلك؟ |  |  |  |  |  |
| 4 | شرح مقدمي الرعاية الصحية حول تطعيم الأطفال المختلفة وأهمية الحصول على التطعيم |  |  |  |  |  |
| 5 | الوقت الذي يقضيه مقدمو الرعاية الصحية عند تطعيم طفلي |  |  |  |  |  |
| 6 | نصيحة من مقدمي الرعاية الصحية ، عند قيامي بالتطعيم |  |  |  |  |  |
| 7 | إحاطة إعلامية قدمت لي بشأن الجرعة ومسار إعطاء اللقاح |  |  |  |  |  |
| 8 | ينظر مقدمو الرعاية الصحية في مخاوفي بشأن التطعيم بجدية |  |  |  |  |  |
| 9 | متابعة المشورة بشأن الآثار السلبية المحتملة وإدارتها |  |  |  |  |  |
| 10 | متابعة المشورة بشأن اللقاح التالي والامتثال له في الموعد المحدد |  |  |  |  |  |
